# Supplementary material for: Ultrafast carrier dynamics in vanadium-doped MoS2 alloys
Source: Royal Society of Chemistry journal article supplement (doi:10.1039/d3nr03337f), 2023-01-01
Supplement: d3nr03337f1.pdf [file d3nr03337f1.pdf]

## Electronic Supplementary Information

### Ultrafast carrier dynamics in vanadium doped MoS<sub>2</sub> alloys

Bhuvan Upadhyay<sup>1,2</sup>, Rahul Sharma<sup>3,4</sup>, Dipak Maity<sup>3</sup>, Tharangattu N. Narayan<sup>3</sup>, Suman Kalyan Pal<sup>1,2</sup>

<sup>1</sup>School of Physical Sciences, Indian Institute of Technology Mandi, Kamand, Mandi, Himachal Pradesh, 175075, India

<sup>2</sup>Advanced Materials Research Center, Indian Institute of Technology Mandi, Kamand, Mandi, Himachal Pradesh, 175075, India

<sup>3</sup>Tata Institute of Fundamental Research-Hyderabad, Sy. No. 36/P, Gopanapally Village, Serilingampally Mandal, Hyderabad-500046, India

<sup>4</sup>Department of physics and Astronomy, Uppsala university, 75236, Uppsala, Sweden

## Determination of the free electron density ( $n_f$ )

The value of  $n_f$  was calculated using Debye-Huckel screening length ( $L_{sc}$ ) relation

$$n_f = \frac{K_p k_B T}{2e^2 L_{sc}}$$

considering the parameter values  $L_{sc} = a_B = 0.6 \text{ nm}^1$ ,  $K_p = \epsilon \times \epsilon_0 = 2.85 \times 8.54 \times 10^{-12} \text{ C}^2/\text{N}\cdot\text{m}^2$ ,  $e = 1.6 \times 10^{-19} \text{ C}$ ,  $T = 300 \text{ K}$ , and  $k_B = 1.38 \times 10^{-23} \text{ J/K}$ .

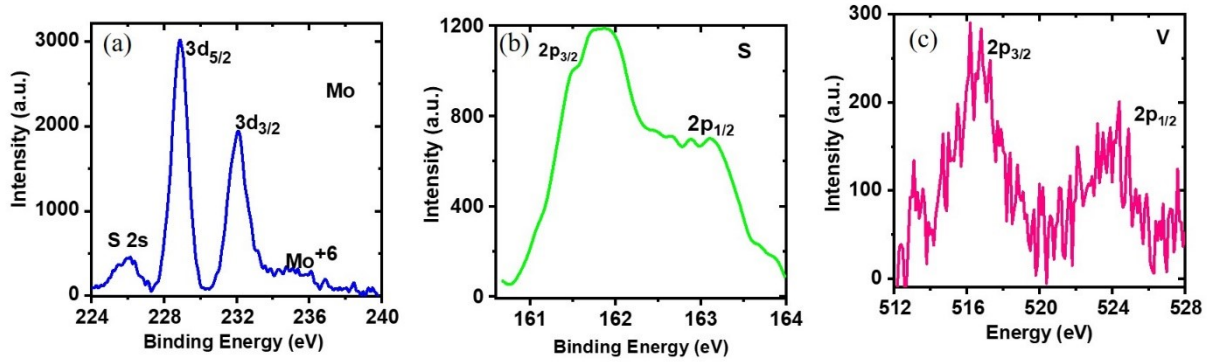

**Fig. S1** X-ray photoemission spectra (XPS) of MH-V-MoS<sub>2</sub> corresponding to (c) molybdenum (Mo), (d) sulphur (S) and (e) vanadium (V).

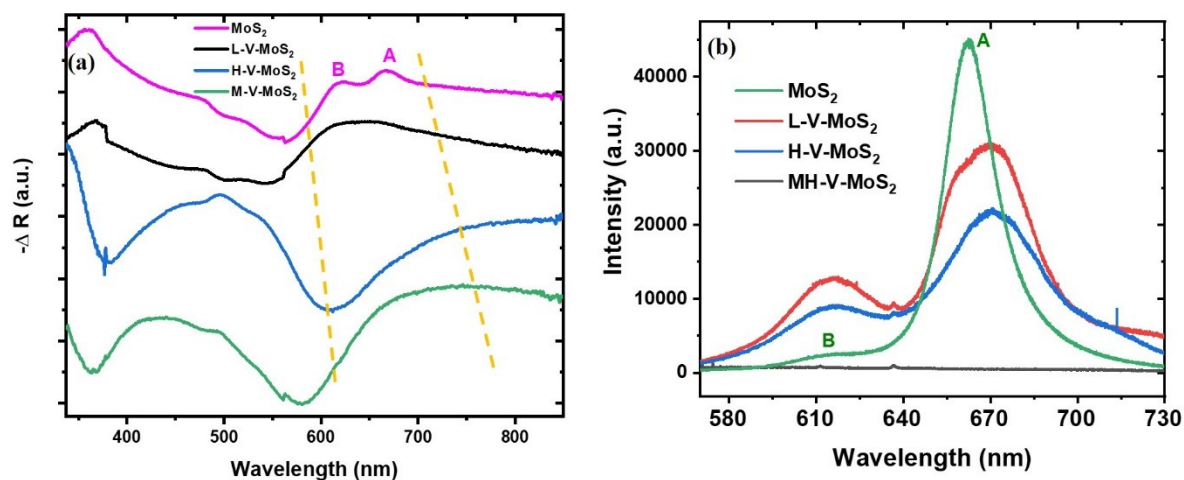

Fig. S2 (a) Linear reflection spectra and (b) photoluminescence (PL) spectra of pristine and V-doped MoS<sub>2</sub> samples.

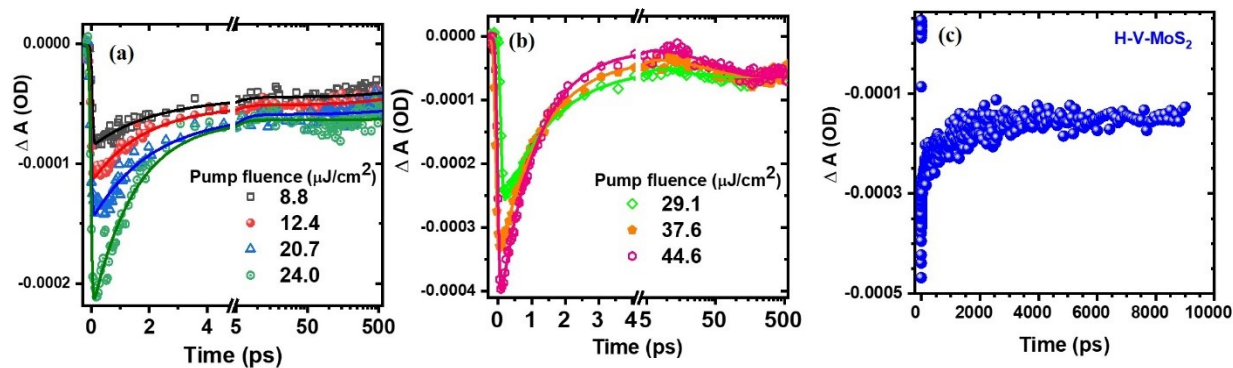

Fig. S3 (a-b) Fitting results for TA kinetics measured at different pump fluences in H-V-MoS<sub>2</sub>. Pump and probe wavelengths used during measurements were 480 and 660 nm, respectively. (c) TA kinetics of H-V-MoS<sub>2</sub> measured up to 9 ns with 660 nm probe and 480 nm pump lights.

**Table S1.** Atomic percentage of Mo, V and S in H-V-MoS<sub>2</sub> alloy obtained from XPS spectra.

| Element- orbital | Peak BE (eV) | FWHM (eV) | Area (P)<br>CPS.eV | Atomic % |
|------------------|--------------|-----------|--------------------|----------|
| S-2p             | 162.12       | 1.09      | 7706.58            | 64.29    |
| Mo-3d            | 229.16       | 1.12      | 21630.97           | 32.09    |
| V-2p             | 513.58       | 1.08      | 1691.38            | 3.62     |

**Table S2.** Atomic percentage of Mo, V and S in MH-V-MoS<sub>2</sub> alloy obtained through XPS measurements.

| Element -orbital | Peak BE (eV) | FWHM (eV) | Area (P)<br>CPS.eV | Atomic % |
|------------------|--------------|-----------|--------------------|----------|
| S-2p             | 161.89       | 1.16      | 2374.60            | 60.95    |
| Mo- 3d           | 228.90       | 1.02      | 6941.79            | 31.69    |
| V-2p             | 516.63       | 2.27      | 1115.12            | 7.36     |

**Table S3.** Fitting results of TA kinetics for A-exciton of ML MoS<sub>2</sub> measured with different pump energy.

| Pump energy (eV) | $\tau_1$ ps (A <sub>1</sub> %) | $\tau_2$ ps (A <sub>2</sub> %) | $\tau_3^*$ ps (A <sub>3</sub> %) |
|------------------|--------------------------------|--------------------------------|----------------------------------|
| 3.02             | 0.20±0.01 (73)                 | 7.50±0.69 (19)                 | 500 (8)                          |
| 2.58             | 0.19±0.01 (71)                 | 8.00±0.57 (15)                 | 500 (14)                         |
| 2.33             | 0.20±0.01 (67)                 | 7.16±0.35 (22)                 | 500 (11)                         |
| 2.00             | 0.21±0.01(60)                  | 16.32±1.12 (23)                | 500 (17)                         |

\* The value of  $\tau_3$  was kept constant during fitting

**Table S4.** Fitting results of TA kinetics at A' band of L-V-MoS<sub>2</sub> measured with different pump energy.

| Pump energy (eV) | $\tau_1$ ps (A <sub>1</sub> %) | $\tau_2$ ps (A <sub>2</sub> %) | $\tau_3^*$ ps (A <sub>3</sub> %) |
|------------------|--------------------------------|--------------------------------|----------------------------------|
| 3.02             | 0.18±0.01 (56)                 | 8.60±0.69 (21)                 | 1000 (23)                        |
| 2.58             | 0.25±0.02 (46)                 | 9.50±0.91 (24)                 | 1000 (30)                        |
| 2.33             | 0.23 ±0.02 (37)                | 8.30±0.87 (25)                 | 1000 (38)                        |
| 2.00             | 0.25±0.09 (31)                 | 10.69±2.09 (31)                | 1000 (38)                        |

\* The value of  $\tau_3$  was kept constant during fitting

**Table S5.** Results of the fitting of TA kinetics of H-V-MoS<sub>2</sub> measured at 665 nm with a pump wavelength 480 nm.

| Pump fluence ( $\mu\text{J}/\text{cm}^2$ ) | Decay-1 (ps) (#FC %)  | Decay-2* (ps) (FC %) | Rise (ps) (FC %)       |
|--------------------------------------------|-----------------------|----------------------|------------------------|
| 8.8                                        | 2.21 $\pm$ 0.23 (83)  | 1000 (17)            | -                      |
| 12.4                                       | 1.84 $\pm$ 0.11 (85)  | 1000 (15)            | -                      |
| 20.7                                       | 2.11 $\pm$ 0.14 (93)  | 1000 (7)             | -                      |
| 24.0                                       | 1.49 $\pm$ 0.07 (99)  | 1000 (1)             | -                      |
| 29.1                                       | 1.56 $\pm$ 0.07 (100) | -                    | 17.44 $\pm$ 7.77 (100) |
| 37.6                                       | 1.29 $\pm$ 0.03 (100) | -                    | 41.37 $\pm$ 7.97 (100) |
| 44.5                                       | 1.12 $\pm$ 0.02 (100) | -                    | 52.54 $\pm$ 6.38 (100) |

\* The value of decay-2 was kept constant during fitting

#FC: fractional contribution

## References

- 1 Y. Yu, G. Li and L. Cao, *arXiv*, 2020, 2007.11509.
